# Supplementary material for: Dietary silver nanoparticles can disturb the gut microbiota in mice
Source: PubMed Central journal article supplement (PMC4939013; doi:10.1186/s12989-016-0149-1), 2016-07-08
Supplement: 12989_2016_149_MOESM2_ESM.pdf [file 12989_2016_149_MOESM2_ESM.pdf]

**Additional file 2: tables**

**Table S1: Oral exposure to Ag NP and mouse final b.w.**

| experiment |                                                             | Ag NP concentrations in pellets (ppb) |                 |                 |                 |
|------------|-------------------------------------------------------------|---------------------------------------|-----------------|-----------------|-----------------|
|            |                                                             | 0                                     | 46              | 460             | 4600            |
|            | Target intake ( $\mu\text{g NP/kg bw/d}$ ) <sup>a</sup>     | 0                                     | 11.4            | 114             | 1140            |
| 1          | Pellet consumption (g/d) <sup>b</sup>                       | 3.1                                   | 3.9             | 3.3             | 3               |
|            | bw (g) <sup>b</sup>                                         | 19.6 $\pm$ 0.8                        | 19.9 $\pm$ 0.26 | 19.9 $\pm$ 0.65 | 20.7 $\pm$ 0.18 |
|            | Calculated intake ( $\mu\text{g NP/kg bw/d}$ ) <sup>c</sup> | 0                                     | 8.6             | 71.8            | 679             |
| 2          | Pellet consumption (g/d) <sup>b</sup>                       | 2.94                                  | 3.93            | 3.33            | 3.05            |
|            | bw (g) <sup>b</sup>                                         | 20.6 $\pm$ 0.17                       | 21.1 $\pm$ 0.35 | 21.6 $\pm$ 0.34 | 21.4 $\pm$ 0.35 |
|            | Calculated intake ( $\mu\text{g NP/kg bw/d}$ ) <sup>c</sup> | 0                                     | 8.6             | 71.1            | 654.9           |
| 3          | Pellet consumption (g/d) <sup>b</sup>                       | 3.64                                  | 3.74            | 3.55            | 3.83            |
|            | bw (g) <sup>b</sup>                                         | 20.7 $\pm$ 0.37                       | 20.5 $\pm$ 0.11 | 20.4 $\pm$ 0.35 | 21.2 $\pm$ 0.44 |
|            | Calculated intake ( $\mu\text{g NP/kg bw/d}$ ) <sup>c</sup> | 0                                     | 7.75            | 78.5            | 800.8           |

<sup>a</sup>Based on a mean consumption of 5 g pellets/d for a 20 g-mouse

<sup>b</sup>Averaged over the 28 d exposure period

<sup>c</sup>(pellet consumption x Ag NP concentration in pellets)/bw
