# Supplementary material for: Dietary silver nanoparticles can disturb the gut microbiota in mice
Source: PubMed Central journal article supplement (PMC4939013; doi:10.1186/s12989-016-0149-1), 2016-07-08
Supplement: 12989_2016_149_MOESM3_ESM.pdf [file 12989_2016_149_MOESM3_ESM.pdf]

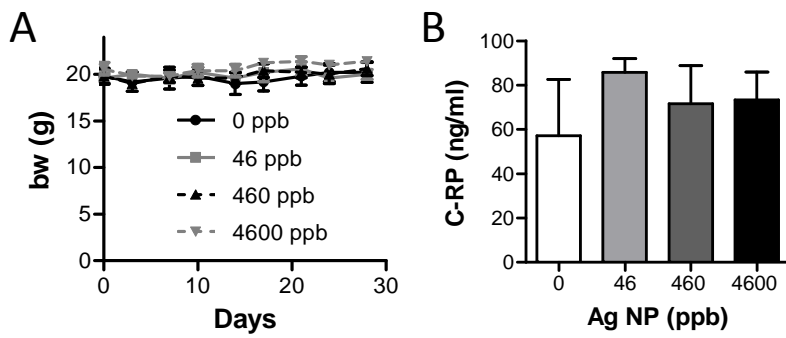

**Figure S1: B.w. and blood C-RP responses in mice orally exposed to Ag NP during 28 d.** C57BL/6 female mice were orally exposed to food supplemented with 0, 46, 460 or 4600 ppb nAg during 28 d. (A) B.w. were measured on d 0 prior to first exposure and twice a week during the experimental period. (B) C-RP was quantified in serum by Luminex. Graphs represent means  $\pm$  SEM ( $n = 3-5$ ).
